# Supplementary material
Source: Springer Nature journal article supplement (https://www.springermedizin.de/resource/supplementary/12885_2011_2906_MOESM9_ESM.pdf/9462288)

# Panc-1

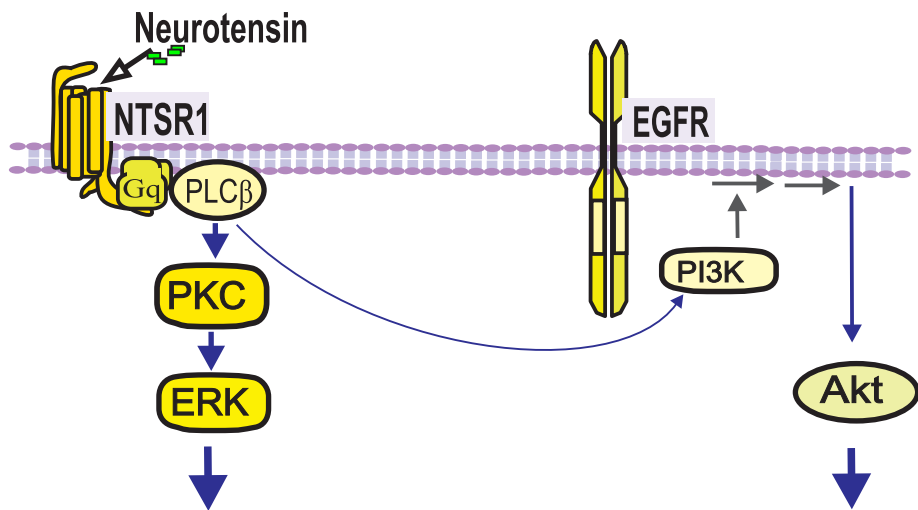

# HT-29

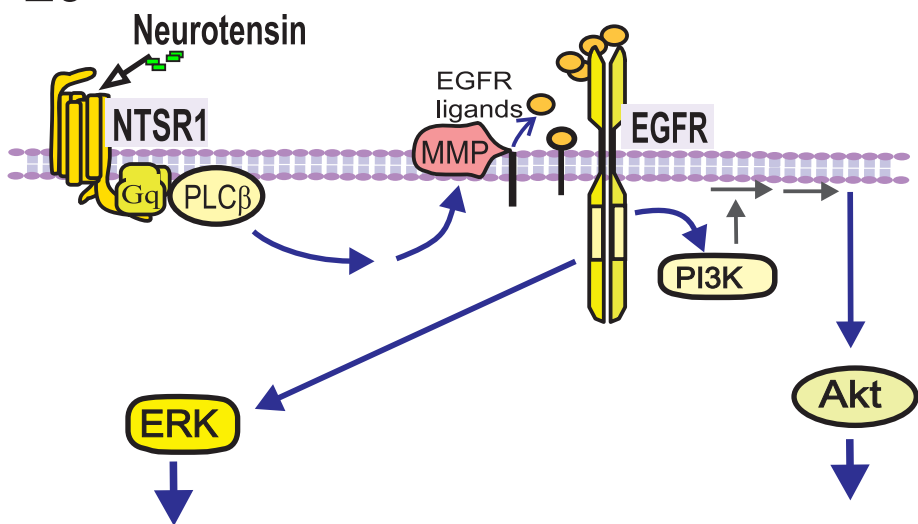

# HCT-116

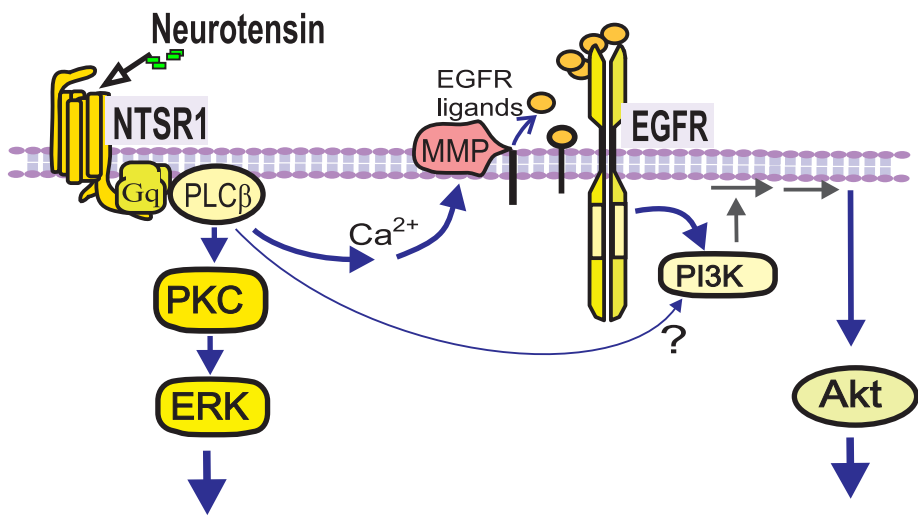

Supplement: MOESM9 [file 9462288]
